# Supplementary material for: Revising the formation and electronic properties in flavylium derivatives. A theoretical tandem towards optimized DSSCs
Source: Royal Society of Chemistry journal article supplement (doi:10.1039/d0nj04701e), 2021-01-01
Supplement: d0nj04701e1.pdf [file d0nj04701e1.pdf]

# Revising the formation and electronic properties in the Flavylum Derivatives. A Theoretical Tandem Towards Optimized DSSCs

Cristian Linares-Flores<sup>a</sup>, Raul Guajardo-Maturana<sup>\*b</sup>, Cristian Tirapegui<sup>a</sup>, Luis Velasquez-Cumplido<sup>b</sup>, Ramiro Arratia-Perez<sup>\*c</sup> and Eduardo Schott<sup>d,e</sup>

<sup>a</sup> Grupo de Investigación en Energía y Procesos Sustentables, Instituto de Ciencias Químicas Aplicada, Facultad de Ingeniería, Universidad Autónoma de Chile

<sup>b</sup> Universidad SEK, Facultad de Ciencias de la Salud, Instituto de Investigación Interdisciplinar en Ciencias Biomédicas SEK (I3CBSEK) Chile, Fernando Manterola 0789, Providencia, Santiago

<sup>c</sup> Centro de Nanociencias Aplicadas, Facultad de Ciencias Exactas, Universidad Andrés Bello, Av. República 275, Santiago, Chile

<sup>d</sup> Departamento de Química Inorgánica, Facultad de Química y Farmacia, Centro de Energía UC, Centro de Investigación en Nanotecnología y Materiales Avanzados CIEN-UC, Pontificia Universidad Católica de Chile, Avenida Vicuña Mackenna, 4860, Santiago, Chile

<sup>e</sup> Millenium Nuclei on Catalytic Process towards Sustainable Chemistry (CSC), (Chile)

\* rhguajar@uc.cl

**Supplementary Information**

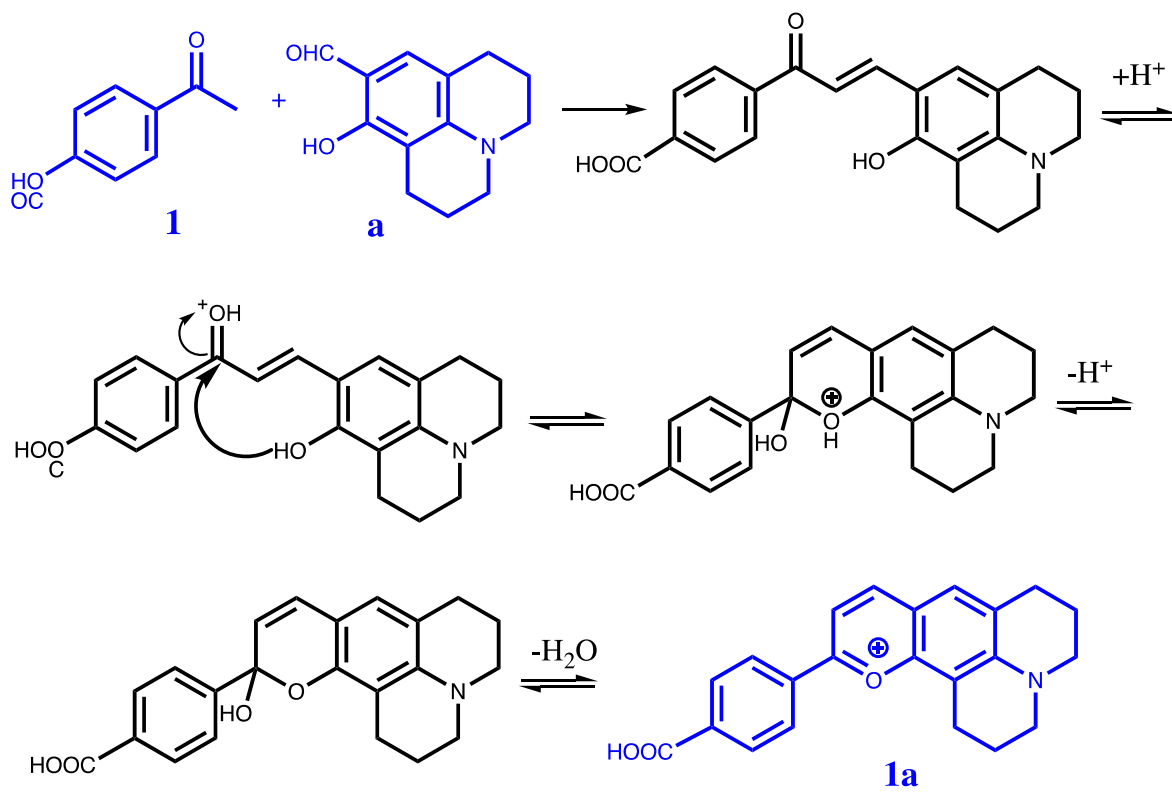

**Scheme S1.** The proposal mechanism of reaction for the flavylum ring-closure.

**Table S1.** Selected structural parameters of Flavylum derivatives.

| Compounds                             | 1a    | 2a    | 3a         | 1b    | 2b    | 3b         | <sup>1,2</sup> Exp. |
|---------------------------------------|-------|-------|------------|-------|-------|------------|---------------------|
| Distance (Å)                          |       |       |            |       |       |            |                     |
| O <sub>21</sub> -C <sub>12</sub>      | 1.34  | 1.34  | 1.34       | 1.34  | 1.35  | 1.34       | 1.34                |
| O <sub>21</sub> -C <sub>16</sub>      | 1.37  | 1.37  | 1.36       | 1.37  | 1.37  | 1.37       | 1.37                |
| C <sub>12</sub> -C <sub>1</sub>       | 1.463 | 1.458 | 1.455      | 1.439 | 1.434 | 1.429      | 1.45                |
| C <sub>12</sub> -C <sub>1</sub> (ES)  | 1.419 | 1.418 | 1.44       | 1.40  | 1.40  | 1.42       |                     |
| O <sub>21</sub> -C <sub>12</sub> (ES) | 1.37  | 1.37  | 1.39       | 1.37  | 1.37  | 1.39       |                     |
| O <sub>21</sub> -C <sub>16</sub> (ES) | 1.34  | 1.35  | 1.37       | 1.35  | 1.35  | 1.37       |                     |
| Dihedral Angle(Deg) (ES)              |       |       | 0.29, 93.5 |       |       | 0.13, 90.9 |                     |
| Dihedral Angle(Deg)                   | 9.47  | 16.32 | 11.36      | 1.192 | 0.854 | 1.06       |                     |

|                         |       |       |       |       |       |       |  |
|-------------------------|-------|-------|-------|-------|-------|-------|--|
| Dihedral Angle(Deg)(ES) | 1.025 | 0.122 | 0.288 | 0.857 | 0.133 | 0.773 |  |
|-------------------------|-------|-------|-------|-------|-------|-------|--|

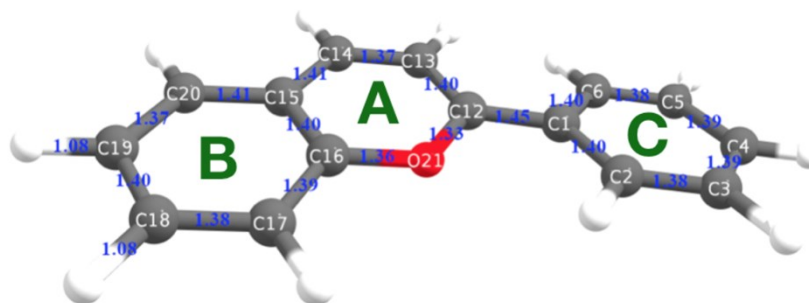

**Figure S1:** structural Representation of Flavylium ion backbone

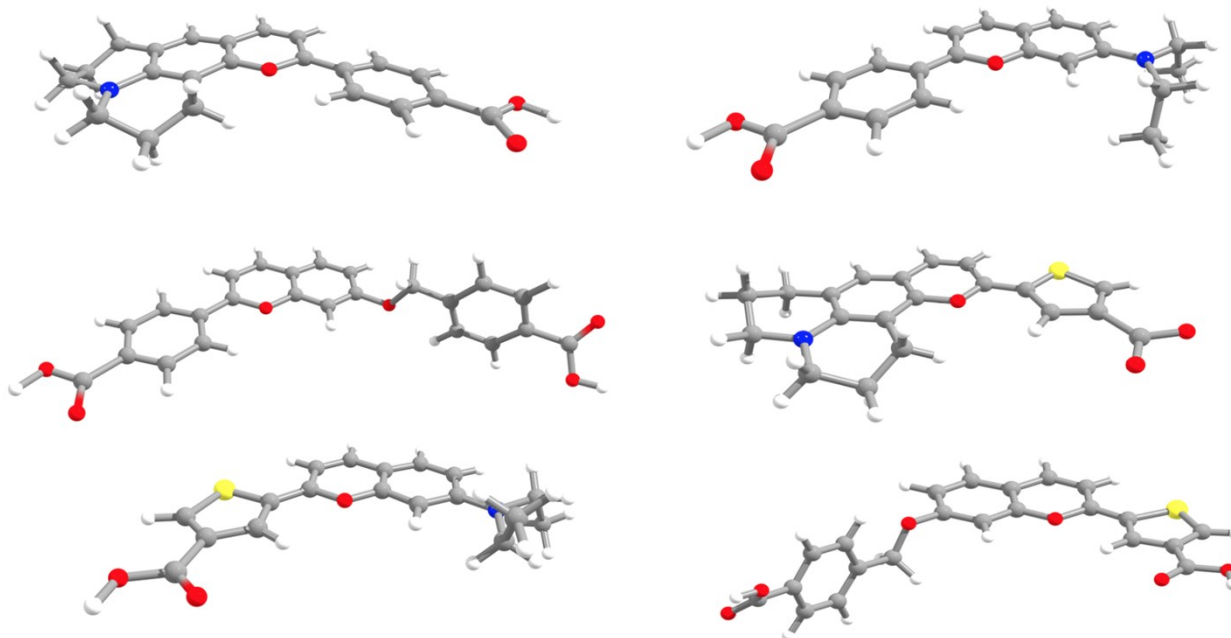

**Figure S2.** Excited state geometries of corresponding flavyliums

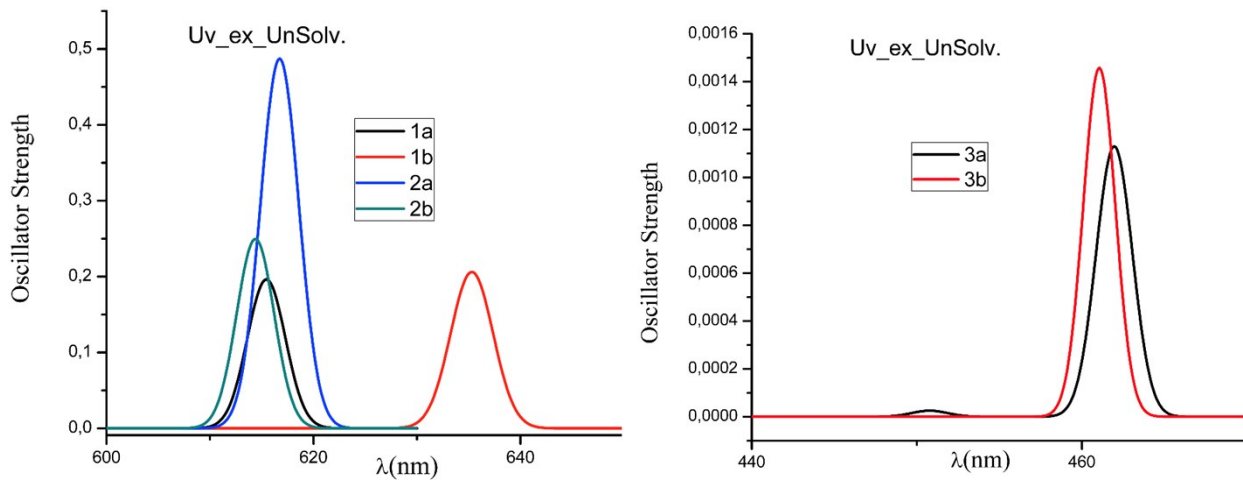

**Figure S3.** Uv-Vis absorptions bands of flavylum derivatives in current study for gas phase.

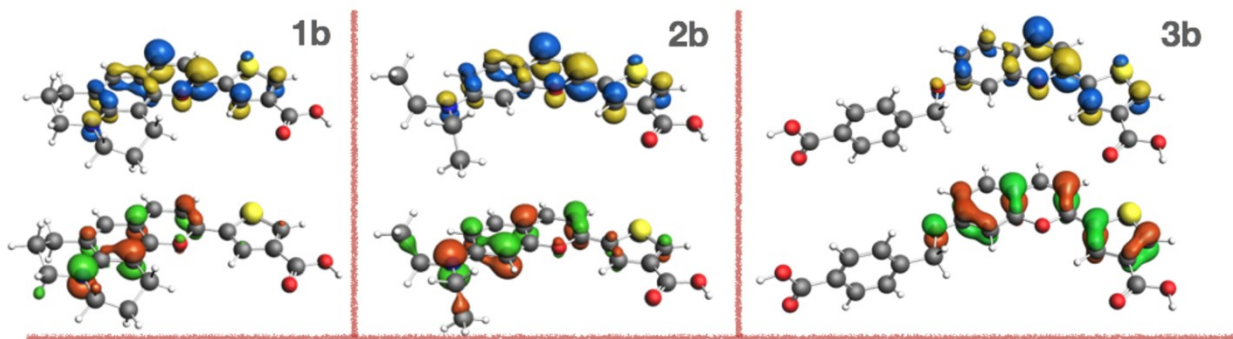

**Figure S4.** Molecular orbitals involved at the electronic transitions of pyrylium derivatives.

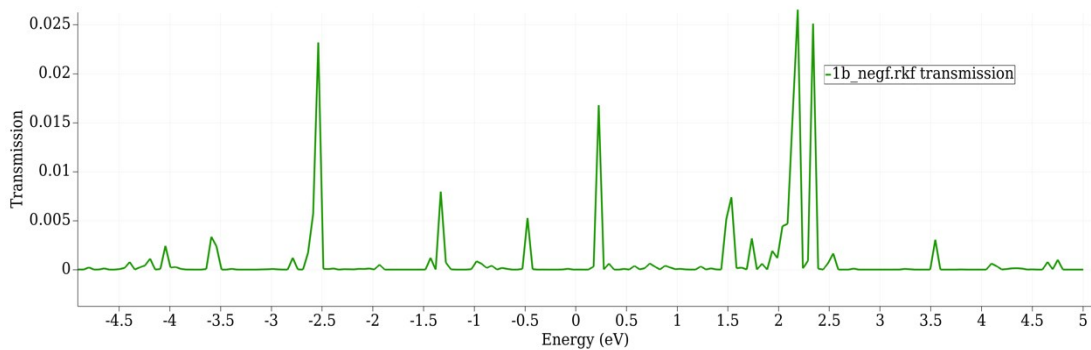

**Figure S5.** Transmission spectra through 1b-flavylium-TiO<sub>2</sub> junction.

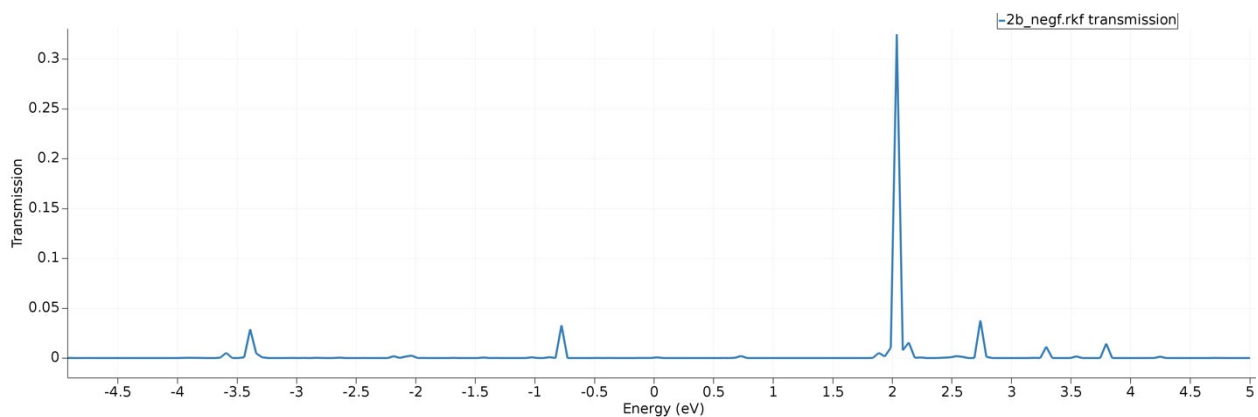

**Figure S6.** Transmission spectra through 2b-flavylium-TiO<sub>2</sub> junction.

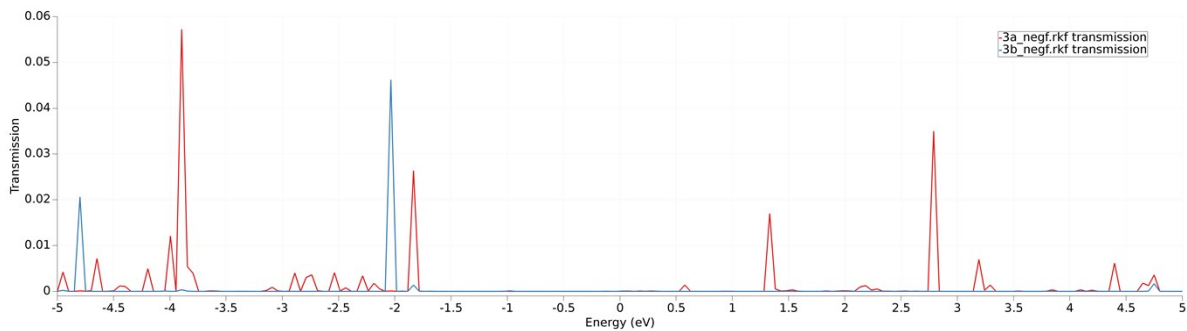

**Figure S7.** Transmission spectra through 3(a,b)-flavylium-TiO<sub>2</sub> junction.
